# Supplementary material
Source: publisher figshare collection journal article supplement (https://karger.figshare.com/ndownloader/files/28961391)
Supplement: Supplementary file 1 [file 28961391]

|  | | | | Cont |  | | CARTp | |  | | Washout | |
| --- | --- | --- | --- | --- | --- | --- | --- | --- | --- | --- | --- | --- |
| 0.002 nM | | 0.02 nM | | 0.2 nM | |
| Control stomach  antrum | sIPSCs | Amp. (pA) | 34.5 ± 2.4 (15) | | | 26.9 ± 1.2 (8) | 23.5 ± 3.3 (8) * | 17.3 ± 1.8 (6) *** | | 26.1 ± 4.6 (4) | |  |
| Freq. (Hz) | 0.86 ± 0.2 (13) | | | 0.26 ± 0.05 (7) | 0.18 ± 0.12 (8) | 0.03 ± 0.01 (6) * | | 0.51 ± 0.42 (5) | |  |
| sEPSCs | Amp. (pA) | 10.9 ± 0.3 (22) | | | 10.3 ± 0.3 (14) | 9.5 ± 0.5 (11) | 8.3 ± 0.6 (11) *** | | 9.2 ± 0.4 (5) | |  |
| Freq. (Hz) | 2.4 ± 0.24 (22) | | | 1.8 ± 0.21 (14) | 1.33 ± 0.18 (11) ** | 0.99 ± 0.23 (10) *** | | 1.4 ± 0.37 (5) | |  |
| Control middle cecum | sIPSCs | Amp. (pA) | 29.1 ± 2.2 (13) | | | 35.3 ± 3.4 (8) | 27.0 ± 3.4 (7) | 21.5 ± 5.3 (5) | | 32.1 ± 4.4 (4) | |  |
| Freq. (Hz) | 0.57 ± 0.13 (13) | | | 0.57 ± 0.14 (8) | 0.3 ± 0.07 (7) | 0.15 ± 0.04 (5) | | 0.52 ± 0.26 (4) | |  |
| sEPSCs | Amp. (pA) | 9.7 ± 0.5 (13) | | | 8.4 ± 0.4 (9) | 8.1 ± 0.4 (8) | 8.1 ± 0.5 (7) | | 8.4 ± 0.5 (4) | |  |
| Freq. (Hz) | 2.15 ± 0.19 (13) | | | 1.41 ± 0.25 (9) | 0.95 ± 0.22 (8) ** | 1.33 ± 0.26 (7) | | 1.31 ± 0.32 (4) | |  |

Supplementary table 1. Effects of CARTp on the sIPSC and sEPSC amplitude and frequency recorded from the presumptive antrum- or middle cecum-projecting DMV neurons of the operated control group

Amp., amplitude; Cont., control; Freq., frequency. The numbers in parentheses indicate the number of cells tested; all the recordings were obtained from 4–13 rats. * *p* < .05, ** *p* < .01, *** *p* < .005 in comparison with the control group, one-way ANOVA.
